# Supplementary material for: Novel Bacterial Taxa in the Human Microbiome
Source: PLoS One. 2012 Jun 13;7(6):e35294. doi: 10.1371/journal.pone.0035294 (PMC3374617; doi:10.1371/journal.pone.0035294)
Supplement: Table S3 — Table describing read attributes, nearest neighbors, RDP calls. (XLSX) [file pone.0035294.s005.xlsx]

## Sheet: NewNovelTable_56+52+33.xls
Subject identifier	Sequence identifier	16S start position	16S end postion	Sequence length	OTU identifier	Number of reads in the OTU	Percent identity to a nearest neighbor	Nearest-neighbor database	Nearest-neighbor sequence identifier	Percent identity to a cultured nearest neighbor	Cultured nearest-neighbor database	Cultured nearest-neighbor sequece identifier	domain name	domain bootstrap	phylum name	phylum bootstrap	class name	class bootstrap	order name	order bootstrap	family name	family bootstrap	genus name	genus bootstrap	Number of Illumina Samples (WGS Reads)	Number of Illumina Subjects (WGS reads)	Total number of subject with this seqeunce	Representative Sequence (variable region reads)
763435843	F4P1PCN01EYL4L	V13	NA	494	1	1	93.6	RDP	S000852351_uncultured_Desulfovibrionaceae_bacterium;_290cost002-P3L-532;_EF454 852	89.3	RDP	S000486049_Desulfovibrio_sp._LNB2;_AY554146_	Bacteria	1	Proteobacteria	1	Deltaproteobacteria	1	Desulfovibrionales	0.95	Desulfovibrionaceae	0.88	Desulfovibrio	0.46	NA	NA	10	R
763820215	GCDIEO201BSP35	V13	NA	507	2	1	90.5	RDP	S000562291_uncultured_chicken_cecal_bacterium;_2G2;_AB075671	90.3	RDP	S000260647_Bacteroides_sp._C46;_AB075694_	Bacteria	1	Bacteroidetes	1	Bacteroidia	1	Bacteroidales	1	Porphyromonadaceae	1	Barnesiella	0.93	NA	NA	8	R
809635352	SRX025495_SRR063903.458514	67	305	244	3	1	96	NT	gi|110441424|gb|DQ801024.1|_Uncultured_bacterium_clone_RL387_aao91a11_16S_ribosomal_RNA_gene,_partial_sequence	84.7	RDP	S000536517_Clostridium_alkalicellulosi;_Z-7026;_AY959944_	Bacteria	1	Firmicutes	0.74	Clostridia	0.71	Clostridiales	0.71	Ruminococcaceae	0.45	Sporobacter	0.1	7	6	6	-
638754422	SRX024348_SRR061731.760194	1263	1409	166	4	2	93.4	NT	gi|312178120|gb|GU389648.1|_Uncultured_bacterium_clone_NBGE212F_16S_ribosomal_RNA_gene,_partial_sequence	92.1	NT	gi|305387455|gb|HQ020487.1|_Bacterium_6LT2_16S_ribosomal_RNA_gene,_partial_sequence	Bacteria	1	Firmicutes	0.86	Clostridia	0.85	Clostridiales	0.69	Veillonellaceae	0.26	Sporotalea	0.24	11	9	10	-
809635352	SRX025495_SRR063904.734286	1112	1395	303	4	2	94.1	NT	gi|126109954|gb|EF399646.1|_Uncultured_bacterium_clone_SJTU_E_01_60_16S_ribosomal_RNA_gene,_partial_sequence	90.8	NT	gi|1616733|gb|U58267.1|ULU58267_Unidentified_low_G+C_gram-positive_bacterium_small_subunit_ribosomal_RNA_gene,_partial_sequence	Bacteria	1	Firmicutes	0.93	Clostridia	0.93	Thermoanaerobacterales	0.55	Thermoanaerobacteraceae	0.55	Mahella	0.46	1	1	1	-
158337416	SRX025494_SRR063901.597774	1205	1409	224	5	1	96.4	NT	gi|148474241|emb|AM278539.2|_Uncultured_bacterium_partial_16S_rRNA_gene,_clone_AP10U.27	92	RDP	S000388430_Papillibacter_cinnamivorans_(T);_CIN1;_DSM12816;_AF167711_	Bacteria	1	Firmicutes	0.77	Clostridia	0.74	Clostridiales	0.64	Ruminococcaceae	0.48	Sporobacter	0.21	11	8	9	-
809635352	SRX025495_SRR063903.939093	4	149	198	6	1	91.8	NT	gi|169279889|gb|EU464414.1|_Uncultured_bacterium_clone_AFBAB_aai04f08_16S_ribosomal_RNA_gene,_partial_sequence	85.1	RDP	S000607274_rumen_bacterium_R-21;_AB239487_	Bacteria	1	Firmicutes	0.84	Clostridia	0.79	Clostridiales	0.76	Ruminococcaceae	0.43	Butyricicoccus	0.33	6	6	7	-
158337416	GEUHUCK01BVBNN	V35	NA	528	7	4	96.8	NT	gi|315534221|dbj|AB606357.1| Uncultured bacterium gene for 16S rRNA, partial sequence, clone: LKMC125, obtained from feces of mouse	89.2	RDP	S000750010_Ruminococcus_albus;_7;_AY445600_	Bacteria	1	Firmicutes	1	Clostridia	1	Clostridiales	1	Ruminococcaceae	0.91	Anaerotruncus	0.21	NA	NA	6	R
809635352	SRX025495_SRR063903.799689	7	149	176	7	4	92	NT	gi|192976208|gb|EU772231.1|_Uncultured_bacterium_clone_AS1_aao37e02.Contig1_16S_ribosomal_RNA_gene,_partial_sequence	88.8	RDP	S000804914_Clostridium_thermocellum_ATCC_27405;_CP000568_	Bacteria	1	Firmicutes	0.84	Clostridia	0.79	Clostridiales	0.67	Ruminococcaceae	0.23	Sporobacter	0.09	2	2	2	-
809635352	SRX025495_SRR063904.854895	7	360	393	7	4	92.6	NT	gi|68988884|dbj|AB107442.1|_Uncultured_bacterium_gene_for_16S_rRNA,_partial_sequence,_clone:_2-C06	89.9	RDP	S000254963_bacterium_YE57;_AY442821_	Bacteria	1	Firmicutes	0.83	Clostridia	0.8	Clostridiales	0.56	Clostridiaceae	0.21	Geosporobacter	0.12	2	2	2	-
809635352	SRX025495_SRR063904.864815	33	455	465	7	4	94.1	NT	gi|290592928|gb|GU606335.1|_Uncultured_bacterium_clone_CF6347_16S_ribosomal_RNA_gene,_partial_sequence	87.8	RDP	S000254963_bacterium_YE57;_AY442821_	Bacteria	1	Firmicutes	0.87	Clostridia	0.85	Clostridiales	0.63	Peptostreptococcaceae	0.09	Sporacetigenium	0.08	2	2	2	-
764143897	GCVYYGS01C9BWS	V13	NA	498	8	1	93.4	RDP	S001122027_uncultured_bacterium;_C4_737;_EU768108	82.6	NT	gi|33860331|gb|AY349374.1|_Eubacterium_sp._oral_clone_GI038_16S_ribosomal_RNA_gene,_partial_sequence	Bacteria	1	Firmicutes	1	Clostridia	1	Clostridiales	1	Lachnospiraceae	0.93	Parasporobacterium	0.67	NA	NA	13	R
604812005	GF0WWCA01CK9V5	V13	NA	317	9	1	96.6	NT	gi|290607511|gb|GU620917.1| Uncultured bacterium clone PF3022 16S ribosomal RNA gene, partial sequence	85.1145	RDP	gi|290607511|gb|GU620917.1| Uncultured bacterium clone PF3022 16S ribosomal RNA gene, partial sequence	Bacteria	1	Firmicutes	0.89	Erysipelotrichi	0.71	Erysipelotrichales	0.71	Erysipelotrichaceae	0.71	Turicibacter	0.69	NA	NA	3	R
638754422	SRX024348_SRR061731.1160977	413	523	135	10	1	96.3	NT	gi|119437483|gb|EF097529.1|_Uncultured_bacterium_clone_SWPT19_aaa03h10_16S_ribosomal_RNA_gene,_partial_sequence	92.6	RDP	S000045207_bacterium_Oil-Tsu-11;_AB081544_	Bacteria	1	Bacteroidetes	0.94	Bacteroidia	0.88	Bacteroidales	0.88	Porphyromonadaceae	0.78	Barnesiella	0.36	4	3	3	-
764143897	GCVYYGS01AZO8H	V13	NA	496	11	5	95.4	RDP	S001127903_uncultured_bacterium;_HY1_h02_2;_EU776209	93	RDP	S001045995_Clostridiaceae_bacterium_DJF_B063;_EU728703_	Bacteria	1	Firmicutes	1	Clostridia	1	Clostridiales	1	Lachnospiraceae	0.99	Dorea	0.99	NA	NA	1	R
764143897	GCVYYGS01DIOLK	V13	NA	490	11	5	95.7	RDP	S000780380_uncultured_bacterium;_RL197_aah85e09;_DQ794329	92.9	RDP	S001045995_Clostridiaceae_bacterium_DJF_B063;_EU728703_	Bacteria	1	Firmicutes	1	Clostridia	1	Clostridiales	1	Lachnospiraceae	0.99	Dorea	0.98	NA	NA	NA	-
158337416	SRX025494_SRR063901.280585	1209	1395	208	11	5	96.7	NT	gi|313759242|gb|GU060405.1|_Uncultured_bacterium_clone_14_16S_ribosomal_RNA_gene,_partial_sequence	92.8	RDP	S001602625_Clostridiales_bacterium_oral_taxon_093;_CK059;_GQ422712_	Bacteria	0.99	Firmicutes	0.81	Clostridia	0.81	Clostridiales	0.75	Clostridiaceae	0.63	Thermotalea	0.28	20	18	18	-
158337416	SRX025494_SRR063901.378884	1201	1395	216	11	5	96.8	NT	gi|224290953|gb|FJ271032.1|_Uncultured_bacterium_clone_DP42_178_16S_ribosomal_RNA_gene,_partial_sequence	93.1	RDP	S001602625_Clostridiales_bacterium_oral_taxon_093;_CK059;_GQ422712_	Bacteria	1	Firmicutes	0.9	Clostridia	0.87	Clostridiales	0.77	Clostridiaceae	0.57	Geosporobacter	0.17	20	18	18	-
158337416	SRX025494_SRR063901.671124	1063	1395	354	11	5	95.2	NT	gi|313759242|gb|GU060405.1|_Uncultured_bacterium_clone_14_16S_ribosomal_RNA_gene,_partial_sequence	92.9	RDP	S001602625_Clostridiales_bacterium_oral_taxon_093;_CK059;_GQ422712_	Bacteria	1	Firmicutes	0.97	Clostridia	0.92	Clostridiales	0.65	Clostridiaceae	0.35	Geosporobacter	0.18	13	10	10	-
638754422	GESGHXH01CLCHX	V35	NA	510	12	12	93.6	RDP	S001080997_uncultured_bacterium;_H-255;_EU622654	87.6	RDP	S000546612_Gram-negative_bacterium_cL10-2b-4;_AY239469_	Bacteria	1	Bacteroidetes	1	Bacteroidia	1	Bacteroidales	1	Porphyromonadaceae	1	Barnesiella	0.96	NA	NA	NA	-
638754422	GESGHXH01COYKK	V35	NA	518	12	12	94	RDP	S001080997_uncultured_bacterium;_H-255;_EU622654	87.9	RDP	S000546612_Gram-negative_bacterium_cL10-2b-4;_AY239469_	Bacteria	1	Bacteroidetes	1	Bacteroidia	1	Bacteroidales	1	Porphyromonadaceae	1	Barnesiella	0.98	NA	NA	1	R
638754422	GFNV2OR02HOAVS	V35	NA	444	12	12	94.2	RDP	S001080997_uncultured_bacterium;_H-255;_EU622654	87.6	RDP	S001080997_uncultured_bacterium;_H-255;_EU622654	Bacteria	1	Bacteroidetes	1	Bacteroidia	1	Bacteroidales	1	Porphyromonadaceae	1	Barnesiella	0.93	NA	NA	NA	-
638754422	SRX024348_SRR061730.1406853	309	564	279	12	12	94.6	NT	gi|119437849|gb|EF097895.1|_Uncultured_bacterium_clone_SWPT12_aaa01e08_16S_ribosomal_RNA_gene,_partial_sequence	90.4	NT	gi|332002450|gb|JF803519.1|_Porphyromonadaceae_bacterium_C941_16S_ribosomal_RNA_gene,_partial_sequence	Bacteria	1	Bacteroidetes	1	Bacteroidia	0.96	Bacteroidales	0.96	Porphyromonadaceae	0.93	Barnesiella	0.76	2	1	1	-
638754422	SRX024348_SRR061730.403287	455	888	443	12	12	94.8	NT	gi|186703417|gb|EU622654.1|_Uncultured_bacterium_clone_H-255_16S_ribosomal_RNA_gene,_complete_sequence	90.1	RDP	S000546612_Gram-negative_bacterium_cL10-2b-4;_AY239469_	Bacteria	1	Bacteroidetes	1	Bacteroidia	1	Bacteroidales	1	Porphyromonadaceae	1	Barnesiella	0.76	0	0	1	-
638754422	SRX024348_SRR061730.522788	7	398	432	12	12	92.6	NT	gi|110450351|gb|DQ824024.1|_Uncultured_bacterium_clone_RL204_aaj58c06_16S_ribosomal_RNA_gene,_partial_sequence	86.6	NT	gi|332002450|gb|JF803519.1|_Porphyromonadaceae_bacterium_C941_16S_ribosomal_RNA_gene,_partial_sequence	Bacteria	1	Bacteroidetes	1	Bacteroidia	0.97	Bacteroidales	0.97	Marinilabiaceae	0.44	Anaerophaga	0.44	2	1	1	-
638754422	SRX024348_SRR061731.202172	207	459	276	12	12	95.3	NT	gi|119437849|gb|EF097895.1|_Uncultured_bacterium_clone_SWPT12_aaa01e08_16S_ribosomal_RNA_gene,_partial_sequence	92.4	NT	gi|332002450|gb|JF803519.1|_Porphyromonadaceae_bacterium_C941_16S_ribosomal_RNA_gene,_partial_sequence	Bacteria	1	Bacteroidetes	1	Bacteroidia	0.97	Bacteroidales	0.97	Marinilabiaceae	0.28	Anaerophaga	0.28	2	1	1	-
638754422	SRX024348_SRR061731.279178	207	523	340	12	12	96.2	NT	gi|119437849|gb|EF097895.1|_Uncultured_bacterium_clone_SWPT12_aaa01e08_16S_ribosomal_RNA_gene,_partial_sequence	93.5	NT	gi|332002450|gb|JF803519.1|_Porphyromonadaceae_bacterium_C941_16S_ribosomal_RNA_gene,_partial_sequence	Bacteria	1	Bacteroidetes	1	Bacteroidia	0.97	Bacteroidales	0.97	Porphyromonadaceae	0.64	Barnesiella	0.45	2	1	1	-
638754422	SRX024348_SRR061731.341736	621	1018	419	12	12	94	NT	gi|126674114|gb|EF406857.1|_Uncultured_bacterium_clone_infected_28days-F7_16S_ribosomal_RNA_gene,_partial_sequence	88.1	RDP	S000734936_Barnesiella_viscericola_(T);_JCM_13660;_C46;_AB267809_	Bacteria	1	Bacteroidetes	1	Bacteroidia	1	Bacteroidales	1	Porphyromonadaceae	0.98	Barnesiella	0.79	2	1	1	-
638754422	SRX024348_SRR061731.488743	50	371	361	12	12	92	NT	gi|110450351|gb|DQ824024.1|_Uncultured_bacterium_clone_RL204_aaj58c06_16S_ribosomal_RNA_gene,_partial_sequence	85.8	RDP	S000546612_Gram-negative_bacterium_cL10-2b-4;_AY239469_	Bacteria	1	Bacteroidetes	1	Bacteroidia	0.83	Bacteroidales	0.83	Porphyromonadaceae	0.51	Paludibacter	0.27	2	1	1	-
638754422	SRX024348_SRR061731.665042	607	994	409	12	12	94.1	NT	gi|126674114|gb|EF406857.1|_Uncultured_bacterium_clone_infected_28days-F7_16S_ribosomal_RNA_gene,_partial_sequence	87.9	RDP	S000357033_Gram-negative_bacterium_cTPY-13;_AY239461_	Bacteria	1	Bacteroidetes	1	Bacteroidia	1	Bacteroidales	1	Porphyromonadaceae	1	Barnesiella	0.89	2	1	1	-
638754422	SRX024348_SRR061731.872372	607	1030	445	12	12	94.4	NT	gi|126674114|gb|EF406857.1|_Uncultured_bacterium_clone_infected_28days-F7_16S_ribosomal_RNA_gene,_partial_sequence	88.8	RDP	S000734936_Barnesiella_viscericola_(T);_JCM_13660;_C46;_AB267809_	Bacteria	1	Bacteroidetes	1	Bacteroidia	1	Bacteroidales	1	Porphyromonadaceae	0.99	Barnesiella	0.91	2	1	1	-
638754422	GESGHXH01A4UGI	V35	NA	395	13	89	95.2	RDP	S000856987_uncultured_bacterium;_16saw37-1d08.p1k;_EF603907	90.2	RDP	S000546612_Gram-negative_bacterium_cL10-2b-4;_AY239469_	Bacteria	1	Bacteroidetes	1	Bacteroidia	0.93	Bacteroidales	0.93	Porphyromonadaceae	0.68	Barnesiella	0.46	NA	NA	NA	-
638754422	GESGHXH01AP1YY	V35	NA	370	13	89	95.1	RDP	S000856987_uncultured_bacterium;_16saw37-1d08.p1k;_EF603907	89.8	RDP	S000546612_Gram-negative_bacterium_cL10-2b-4;_AY239469_	Bacteria	1	Bacteroidetes	1	Bacteroidia	0.93	Bacteroidales	0.93	Porphyromonadaceae	0.78	Barnesiella	0.55	NA	NA	NA	-
638754422	GESGHXH01B001A	V35	NA	463	13	89	94.6	RDP	S000855849_uncultured_bacterium;_16saw30-1h04.w2k;_EF602769	88.8	RDP	S000546612_Gram-negative_bacterium_cL10-2b-4;_AY239469_	Bacteria	1	Bacteroidetes	0.98	Bacteroidia	0.97	Bacteroidales	0.97	Porphyromonadaceae	0.82	Barnesiella	0.76	NA	NA	NA	-
638754422	GESGHXH01B3XHL	V35	NA	493	13	89	94.5	RDP	S000855849_uncultured_bacterium;_16saw30-1h04.w2k;_EF602769	88.2	RDP	S000546612_Gram-negative_bacterium_cL10-2b-4;_AY239469_	Bacteria	1	Bacteroidetes	0.99	Bacteroidia	0.99	Bacteroidales	0.99	Porphyromonadaceae	0.83	Barnesiella	0.69	NA	NA	NA	-
638754422	GESGHXH01BQSFB	V35	NA	488	13	89	94.1	RDP	S001111348_uncultured_bacterium;_K80N1_74g09;_EU456690	88.3	RDP	S000546612_Gram-negative_bacterium_cL10-2b-4;_AY239469_	Bacteria	1	Bacteroidetes	0.99	Bacteroidia	0.98	Bacteroidales	0.98	Porphyromonadaceae	0.8	Barnesiella	0.56	NA	NA	NA	-
638754422	GESGHXH01BXVLB	V35	NA	448	13	89	94.9	RDP	S001111348_uncultured_bacterium;_K80N1_74g09;_EU456690	87.5	RDP	S000357033_Gram-negative_bacterium_cTPY-13;_AY239461_	Bacteria	1	Bacteroidetes	1	Bacteroidia	0.99	Bacteroidales	0.99	Porphyromonadaceae	0.84	Barnesiella	0.67	NA	NA	NA	-
638754422	GESGHXH01C094N	V35	NA	402	13	89	95.3	RDP	S000856987_uncultured_bacterium;_16saw37-1d08.p1k;_EF603907	90.3	RDP	S000546612_Gram-negative_bacterium_cL10-2b-4;_AY239469_	Bacteria	1	Bacteroidetes	1	Bacteroidia	0.97	Bacteroidales	0.97	Porphyromonadaceae	0.74	Barnesiella	0.52	NA	NA	NA	-
638754422	GESGHXH01C9R2E	V35	NA	468	13	89	94.2	RDP	S001111348_uncultured_bacterium;_K80N1_74g09;_EU456690	88.4	RDP	S000546612_Gram-negative_bacterium_cL10-2b-4;_AY239469_	Bacteria	1	Bacteroidetes	1	Bacteroidia	0.97	Bacteroidales	0.97	Porphyromonadaceae	0.83	Barnesiella	0.74	NA	NA	NA	-
638754422	GESGHXH01CBWGX	V35	NA	487	13	89	94.3	RDP	S000855849_uncultured_bacterium;_16saw30-1h04.w2k;_EF602769	88.3	RDP	S000546612_Gram-negative_bacterium_cL10-2b-4;_AY239469_	Bacteria	1	Bacteroidetes	1	Bacteroidia	0.96	Bacteroidales	0.96	Porphyromonadaceae	0.75	Barnesiella	0.59	NA	NA	NA	-
638754422	GESGHXH01CD0HV	V35	NA	409	13	89	95.4	RDP	S000856987_uncultured_bacterium;_16saw37-1d08.p1k;_EF603907	90.5	RDP	S000546612_Gram-negative_bacterium_cL10-2b-4;_AY239469_	Bacteria	1	Bacteroidetes	1	Bacteroidia	0.95	Bacteroidales	0.95	Porphyromonadaceae	0.76	Barnesiella	0.52	NA	NA	NA	-
638754422	GESGHXH01CLR4K	V35	NA	497	13	89	94	RDP	S001456575_uncultured_bacterium;_nbw879c05c1;_GQ030511	87.7	RDP	S000546612_Gram-negative_bacterium_cL10-2b-4;_AY239469_	Bacteria	1	Bacteroidetes	1	Bacteroidia	0.99	Bacteroidales	0.99	Porphyromonadaceae	0.82	Barnesiella	0.65	NA	NA	7	R
638754422	GESGHXH01CPIHC	V35	NA	493	13	89	94.5	RDP	S001111348_uncultured_bacterium;_K80N1_74g09;_EU456690	88.4	RDP	S000546612_Gram-negative_bacterium_cL10-2b-4;_AY239469_	Bacteria	1	Bacteroidetes	1	Bacteroidia	0.98	Bacteroidales	0.98	Porphyromonadaceae	0.83	Barnesiella	0.7	NA	NA	NA	-
638754422	GESGHXH01CWMWG	V35	NA	494	13	89	94.5	RDP	S001111348_uncultured_bacterium;_K80N1_74g09;_EU456690	88.2	RDP	S000546612_Gram-negative_bacterium_cL10-2b-4;_AY239469_	Bacteria	1	Bacteroidetes	1	Bacteroidia	0.95	Bacteroidales	0.95	Porphyromonadaceae	0.81	Barnesiella	0.71	NA	NA	NA	-
638754422	GESGHXH01CXI4P	V35	NA	466	13	89	94.4	RDP	S000855849_uncultured_bacterium;_16saw30-1h04.w2k;_EF602769	88.6	RDP	S000546612_Gram-negative_bacterium_cL10-2b-4;_AY239469_	Bacteria	1	Bacteroidetes	1	Bacteroidia	0.99	Bacteroidales	0.99	Porphyromonadaceae	0.9	Barnesiella	0.8	NA	NA	NA	-
638754422	GESGHXH01D1OQR	V35	NA	482	13	89	94.6	RDP	S001111348_uncultured_bacterium;_K80N1_74g09;_EU456690	88.5	RDP	S000546612_Gram-negative_bacterium_cL10-2b-4;_AY239469_	Bacteria	1	Bacteroidetes	1	Bacteroidia	0.98	Bacteroidales	0.98	Porphyromonadaceae	0.84	Barnesiella	0.73	NA	NA	NA	-
638754422	GESGHXH01DMCPT	V35	NA	489	13	89	94.3	RDP	S000855849_uncultured_bacterium;_16saw30-1h04.w2k;_EF602769	88.3	RDP	S000546612_Gram-negative_bacterium_cL10-2b-4;_AY239469_	Bacteria	1	Bacteroidetes	1	Bacteroidia	0.97	Bacteroidales	0.97	Porphyromonadaceae	0.8	Barnesiella	0.69	NA	NA	NA	-
638754422	GESGHXH01DQ0PA	V35	NA	496	13	89	94.6	RDP	S001111348_uncultured_bacterium;_K80N1_74g09;_EU456690	88.3	RDP	S000546612_Gram-negative_bacterium_cL10-2b-4;_AY239469_	Bacteria	1	Bacteroidetes	1	Bacteroidia	0.95	Bacteroidales	0.95	Porphyromonadaceae	0.85	Barnesiella	0.67	NA	NA	NA	-
638754422	GESGHXH01EC4AO	V35	NA	492	13	89	94.5	RDP	S001456575_uncultured_bacterium;_nbw879c05c1;_GQ030511	88.2	RDP	S000546612_Gram-negative_bacterium_cL10-2b-4;_AY239469_	Bacteria	1	Bacteroidetes	0.99	Bacteroidia	0.97	Bacteroidales	0.97	Porphyromonadaceae	0.86	Barnesiella	0.75	NA	NA	NA	-
638754422	GESGHXH01EQO40	V35	NA	493	13	89	94.7	RDP	S001111348_uncultured_bacterium;_K80N1_74g09;_EU456690	88.4	RDP	S000546612_Gram-negative_bacterium_cL10-2b-4;_AY239469_	Bacteria	1	Bacteroidetes	1	Bacteroidia	0.97	Bacteroidales	0.97	Porphyromonadaceae	0.78	Barnesiella	0.63	NA	NA	NA	-
638754422	GESGHXH01ES20Z	V35	NA	492	13	89	94.3	RDP	S001111348_uncultured_bacterium;_K80N1_74g09;_EU456690	88.2	RDP	S000546612_Gram-negative_bacterium_cL10-2b-4;_AY239469_	Bacteria	1	Bacteroidetes	1	Bacteroidia	0.98	Bacteroidales	0.98	Porphyromonadaceae	0.89	Barnesiella	0.75	NA	NA	NA	-
638754422	GESGHXH01ESRT2	V35	NA	465	13	89	94.2	RDP	S001111348_uncultured_bacterium;_K80N1_74g09;_EU456690	88.6	RDP	S000546612_Gram-negative_bacterium_cL10-2b-4;_AY239469_	Bacteria	1	Bacteroidetes	1	Bacteroidia	0.98	Bacteroidales	0.98	Porphyromonadaceae	0.87	Barnesiella	0.74	NA	NA	NA	-
638754422	GF0TCOT01A0GZ7	V13	NA	470	13	89	93.3	RDP	S000856791_uncultured_bacterium;_16saw34-1h01.w2k;_EF603711	85.7	RDP	S000546612_Gram-negative_bacterium_cL10-2b-4;_AY239469_	Bacteria	1	Bacteroidetes	1	Bacteroidia	0.97	Bacteroidales	0.97	Porphyromonadaceae	0.96	Barnesiella	0.45	NA	NA	NA	-
638754422	GF0TCOT01ATX3Q	V13	NA	495	13	89	93.8	RDP	S000762255_uncultured_bacterium;_SWPT12_aaa03b05;_EF097970	86.8	RDP	S000546612_Gram-negative_bacterium_cL10-2b-4;_AY239469_	Bacteria	1	Bacteroidetes	1	Bacteroidia	0.99	Bacteroidales	0.99	Porphyromonadaceae	0.97	Barnesiella	0.48	NA	NA	NA	-
638754422	GF0TCOT01AV4YB	V13	NA	495	13	89	93.8	RDP	S000856791_uncultured_bacterium;_16saw34-1h01.w2k;_EF603711	86.4	RDP	S000546612_Gram-negative_bacterium_cL10-2b-4;_AY239469_	Bacteria	1	Bacteroidetes	1	Bacteroidia	0.99	Bacteroidales	0.99	Porphyromonadaceae	0.98	Barnesiella	0.56	NA	NA	NA	-
638754422	GF0TCOT01B0VZM	V13	NA	317	13	89	95.8	RDP	S000762255_uncultured_bacterium;_SWPT12_aaa03b05;_EF097970	83.6	RDP	S000734936_Barnesiella_viscericola_(T);_JCM_13660;_C46;_AB267809_	Bacteria	1	Bacteroidetes	0.99	Bacteroidia	0.97	Bacteroidales	0.97	Porphyromonadaceae	0.91	Barnesiella	0.32	NA	NA	NA	-
638754422	GF0TCOT01B4QB2	V13	NA	440	13	89	93.7	RDP	S000762255_uncultured_bacterium;_SWPT12_aaa03b05;_EF097970	85.8	RDP	S000546612_Gram-negative_bacterium_cL10-2b-4;_AY239469_	Bacteria	1	Bacteroidetes	0.99	Bacteroidia	0.98	Bacteroidales	0.98	Porphyromonadaceae	0.84	Barnesiella	0.32	NA	NA	NA	-
638754422	GF0TCOT01B9S7Q	V13	NA	320	13	89	95.3	RDP	S000762255_uncultured_bacterium;_SWPT12_aaa03b05;_EF097970	85.9	RDP	S000546612_Gram-negative_bacterium_cL10-2b-4;_AY239469_	Bacteria	1	Bacteroidetes	0.97	Bacteroidia	0.96	Bacteroidales	0.96	Porphyromonadaceae	0.87	Barnesiella	0.31	NA	NA	NA	-
638754422	GF0TCOT01BBE28	V13	NA	322	13	89	96.2	RDP	S000762255_uncultured_bacterium;_SWPT12_aaa03b05;_EF097970	85.7	RDP	S000546612_Gram-negative_bacterium_cL10-2b-4;_AY239469_	Bacteria	1	Bacteroidetes	1	Bacteroidia	0.98	Bacteroidales	0.98	Porphyromonadaceae	0.87	Barnesiella	0.34	NA	NA	NA	-
638754422	GF0TCOT01BNR19	V13	NA	494	13	89	93.6	RDP	S000762255_uncultured_bacterium;_SWPT12_aaa03b05;_EF097970	86.5	RDP	S000546612_Gram-negative_bacterium_cL10-2b-4;_AY239469_	Bacteria	1	Bacteroidetes	1	Bacteroidia	0.95	Bacteroidales	0.95	Porphyromonadaceae	0.94	Barnesiella	0.5	NA	NA	NA	-
638754422	GF0TCOT01BRT0O	V13	NA	495	13	89	94	RDP	S000762255_uncultured_bacterium;_SWPT12_aaa03b05;_EF097970	86.8	RDP	S000546612_Gram-negative_bacterium_cL10-2b-4;_AY239469_	Bacteria	1	Bacteroidetes	1	Bacteroidia	1	Bacteroidales	1	Porphyromonadaceae	0.95	Barnesiella	0.49	NA	NA	NA	-
638754422	GF0TCOT01BSMR4	V13	NA	493	13	89	93.4	RDP	S000856833_uncultured_bacterium;_16saw35-1b11.p1k;_EF603753	86.1	RDP	S000546612_Gram-negative_bacterium_cL10-2b-4;_AY239469_	Bacteria	1	Bacteroidetes	1	Bacteroidia	0.99	Bacteroidales	0.99	Porphyromonadaceae	0.97	Barnesiella	0.5	NA	NA	NA	-
638754422	GF0TCOT01BU0D1	V13	NA	467	13	89	93	RDP	S000856833_uncultured_bacterium;_16saw35-1b11.p1k;_EF603753	85.3	RDP	S000546612_Gram-negative_bacterium_cL10-2b-4;_AY239469_	Bacteria	1	Bacteroidetes	0.99	Bacteroidia	0.95	Bacteroidales	0.95	Porphyromonadaceae	0.87	Barnesiella	0.4	NA	NA	NA	-
638754422	GF0TCOT01CAX36	V13	NA	424	13	89	93.5	RDP	S001109241_uncultured_bacterium;_H83N1_95c04;_EU454583	85.2	RDP	S000546612_Gram-negative_bacterium_cL10-2b-4;_AY239469_	Bacteria	1	Bacteroidetes	0.97	Bacteroidia	0.97	Bacteroidales	0.97	Porphyromonadaceae	0.91	Barnesiella	0.37	NA	NA	NA	-
638754422	GF0TCOT01CP31O	V13	NA	453	13	89	93.2	RDP	S000762255_uncultured_bacterium;_SWPT12_aaa03b05;_EF097970	85.8	RDP	S000546612_Gram-negative_bacterium_cL10-2b-4;_AY239469_	Bacteria	1	Bacteroidetes	1	Bacteroidia	0.99	Bacteroidales	0.99	Porphyromonadaceae	0.89	Barnesiella	0.48	NA	NA	NA	-
638754422	GF0TCOT01CPFXZ	V13	NA	430	13	89	94.1	RDP	S001380556_uncultured_bacterium;_R-9540;_FJ879905	85.8	RDP	S000546612_Gram-negative_bacterium_cL10-2b-4;_AY239469_	Bacteria	1	Bacteroidetes	0.98	Bacteroidia	0.95	Bacteroidales	0.95	Porphyromonadaceae	0.85	Barnesiella	0.37	NA	NA	NA	-
638754422	GF0TCOT01CVSZ9	V13	NA	305	13	89	95.4	RDP	S001422434_uncultured_bacterium;_HD5++39;_EU790998	84.8	RDP	S001887382_Bacteroidetes_bacterium_oral_taxon_280;_WWP_SS3_G18;_GU409275_	Bacteria	0.99	Bacteroidetes	0.99	Bacteroidia	0.98	Bacteroidales	0.98	Porphyromonadaceae	0.91	Barnesiella	0.3	NA	NA	NA	-
638754422	GF0TCOT01CWJCQ	V13	NA	296	13	89	96.6	RDP	S001422473_uncultured_bacterium;_HD5++83;_EU791037	87.4	RDP	S000968438_Eubacterium_sp._F1;_EU281854_	Bacteria	1	Bacteroidetes	1	Bacteroidia	0.98	Bacteroidales	0.98	Porphyromonadaceae	0.94	Barnesiella	0.35	NA	NA	NA	-
638754422	GF0TCOT01CXMWB	V13	NA	494	13	89	93.6	RDP	S000856791_uncultured_bacterium;_16saw34-1h01.w2k;_EF603711	86.1	RDP	S000546612_Gram-negative_bacterium_cL10-2b-4;_AY239469_	Bacteria	1	Bacteroidetes	0.99	Bacteroidia	0.98	Bacteroidales	0.98	Porphyromonadaceae	0.96	Barnesiella	0.49	NA	NA	NA	-
638754422	GF0TCOT01D1DX9	V13	NA	494	13	89	93.8	RDP	S000762255_uncultured_bacterium;_SWPT12_aaa03b05;_EF097970	86.5	RDP	S000546612_Gram-negative_bacterium_cL10-2b-4;_AY239469_	Bacteria	1	Bacteroidetes	1	Bacteroidia	0.99	Bacteroidales	0.99	Porphyromonadaceae	0.94	Barnesiella	0.42	NA	NA	NA	-
638754422	GF0TCOT01DHYRP	V13	NA	497	13	89	93.2	RDP	S000856833_uncultured_bacterium;_16saw35-1b11.p1k;_EF603753	86	RDP	S000546612_Gram-negative_bacterium_cL10-2b-4;_AY239469_	Bacteria	1	Bacteroidetes	1	Bacteroidia	0.99	Bacteroidales	0.99	Porphyromonadaceae	0.96	Barnesiella	0.36	NA	NA	4	R
638754422	GF0TCOT01DZW25	V13	NA	316	13	89	95.8	RDP	S000762255_uncultured_bacterium;_SWPT12_aaa03b05;_EF097970	86.8	RDP	S000546612_Gram-negative_bacterium_cL10-2b-4;_AY239469_	Bacteria	1	Bacteroidetes	0.99	Bacteroidia	0.99	Bacteroidales	0.99	Porphyromonadaceae	0.9	Barnesiella	0.36	NA	NA	NA	-
638754422	GF0TCOT01EDFJ4	V13	NA	370	13	89	93.3	RDP	S001109241_uncultured_bacterium;_H83N1_95c04;_EU454583	84.4	RDP	S000546612_Gram-negative_bacterium_cL10-2b-4;_AY239469_	Bacteria	1	Bacteroidetes	0.99	Bacteroidia	0.98	Bacteroidales	0.98	Porphyromonadaceae	0.85	Barnesiella	0.19	NA	NA	NA	-
638754422	GF0TCOT01EFEBO	V13	NA	354	13	89	93.8	RDP	S001380556_uncultured_bacterium;_R-9540;_FJ879905	85.1	RDP	S000546612_Gram-negative_bacterium_cL10-2b-4;_AY239469_	Bacteria	0.99	Bacteroidetes	0.98	Bacteroidia	0.96	Bacteroidales	0.96	Porphyromonadaceae	0.9	Barnesiella	0.31	NA	NA	NA	-
638754422	GF0TCOT01ESOA9	V13	NA	236	13	89	96.6	RDP	S001580137_uncultured_bacterium;_16saw56-1h01.w2k;_GQ296174	89	RDP	S000968438_Eubacterium_sp._F1;_EU281854_	Bacteria	1	Bacteroidetes	1	Bacteroidia	1	Bacteroidales	1	Porphyromonadaceae	0.89	Barnesiella	0.61	NA	NA	NA	-
638754422	GFNV2OR02FVKQX	V35	NA	467	13	89	94.7	RDP	S001456575_uncultured_bacterium;_nbw879c05c1;_GQ030511	88.8	RDP	S001456575_uncultured_bacterium;_nbw879c05c1;_GQ030511	Bacteria	1	Bacteroidetes	1	Bacteroidia	0.99	Bacteroidales	0.99	Porphyromonadaceae	0.86	Barnesiella	0.73	NA	NA	NA	-
638754422	SRX024348_SRR061730.1008388	438	766	327	13	89	95.7	NT	gi|119436398|gb|EF096444.1|_Uncultured_bacterium_clone_obob2_aaa02h08_16S_ribosomal_RNA_gene,_partial_sequence	92.9	RDP	S000546612_Gram-negative_bacterium_cL10-2b-4;_AY239469_	Bacteria	1	Bacteroidetes	0.99	Bacteroidia	0.93	Bacteroidales	0.93	Porphyromonadaceae	0.82	Barnesiella	0.49	3	2	2	-
638754422	SRX024348_SRR061730.1234932	226	523	320	13	89	96.9	NT	gi|119438861|gb|EF098907.1|_Uncultured_bacterium_clone_SWPT1_aaa03b02_16S_ribosomal_RNA_gene,_partial_sequence	90.9	RDP	S000968438_Eubacterium_sp._F1;_EU281854_	Bacteria	1	Bacteroidetes	1	Bacteroidia	1	Bacteroidales	1	Porphyromonadaceae	0.97	Barnesiella	0.71	2	1	1	-
638754422	SRX024348_SRR061730.1347585	438	870	441	13	89	95.9	NT	gi|148247877|gb|EF603907.1|_Uncultured_bacterium_clone_16saw37-1d08.p1k_16S_ribosomal_RNA_gene,_partial_sequence	91.4	RDP	S000546612_Gram-negative_bacterium_cL10-2b-4;_AY239469_	Bacteria	1	Bacteroidetes	1	Bacteroidia	0.99	Bacteroidales	0.99	Porphyromonadaceae	0.84	Barnesiella	0.56	2	1	1	-
638754422	SRX024348_SRR061730.168806	19	398	426	13	89	94.6	NT	gi|223688918|gb|FJ684621.1|_Uncultured_bacterium_clone_6-8H22_16S_ribosomal_RNA_gene,_partial_sequence	87.5	RDP	S000546612_Gram-negative_bacterium_cL10-2b-4;_AY239469_	Bacteria	1	Bacteroidetes	0.99	Bacteroidia	0.98	Bacteroidales	0.98	Porphyromonadaceae	0.95	Paludibacter	0.35	2	1	1	-
638754422	SRX024348_SRR061730.169003	438	846	417	13	89	95.7	NT	gi|148247877|gb|EF603907.1|_Uncultured_bacterium_clone_16saw37-1d08.p1k_16S_ribosomal_RNA_gene,_partial_sequence	90.9	RDP	S000546612_Gram-negative_bacterium_cL10-2b-4;_AY239469_	Bacteria	1	Bacteroidetes	1	Bacteroidia	0.97	Bacteroidales	0.97	Porphyromonadaceae	0.78	Barnesiella	0.47	2	1	1	-
638754422	SRX024348_SRR061730.179333	438	834	405	13	89	95.6	NT	gi|148247877|gb|EF603907.1|_Uncultured_bacterium_clone_16saw37-1d08.p1k_16S_ribosomal_RNA_gene,_partial_sequence	90.7	RDP	S000546612_Gram-negative_bacterium_cL10-2b-4;_AY239469_	Bacteria	1	Bacteroidetes	1	Bacteroidia	0.99	Bacteroidales	0.99	Porphyromonadaceae	0.79	Barnesiella	0.55	2	1	1	-
638754422	SRX024348_SRR061730.266510	226	461	258	13	89	96.5	NT	gi|148246734|gb|EF602764.1|_Uncultured_bacterium_clone_16saw30-1f03.w2k_16S_ribosomal_RNA_gene,_partial_sequence	89.1	RDP	S000968438_Eubacterium_sp._F1;_EU281854_	Bacteria	1	Bacteroidetes	1	Bacteroidia	0.99	Bacteroidales	0.99	Porphyromonadaceae	0.9	Barnesiella	0.5	2	1	1	-
638754422	SRX024348_SRR061730.281096	226	523	320	13	89	96.9	NT	gi|119438861|gb|EF098907.1|_Uncultured_bacterium_clone_SWPT1_aaa03b02_16S_ribosomal_RNA_gene,_partial_sequence	91.2	RDP	S000968438_Eubacterium_sp._F1;_EU281854_	Bacteria	1	Bacteroidetes	1	Bacteroidia	1	Bacteroidales	1	Porphyromonadaceae	0.99	Barnesiella	0.56	2	1	1	-
638754422	SRX024348_SRR061730.303392	438	730	291	13	89	95.2	NT	gi|119436398|gb|EF096444.1|_Uncultured_bacterium_clone_obob2_aaa02h08_16S_ribosomal_RNA_gene,_partial_sequence	92.8	RDP	S000546612_Gram-negative_bacterium_cL10-2b-4;_AY239469_	Bacteria	1	Bacteroidetes	0.99	Bacteroidia	0.96	Bacteroidales	0.96	Porphyromonadaceae	0.95	Barnesiella	0.47	3	2	2	-
638754422	SRX024348_SRR061730.374822	226	523	320	13	89	96.9	NT	gi|119438861|gb|EF098907.1|_Uncultured_bacterium_clone_SWPT1_aaa03b02_16S_ribosomal_RNA_gene,_partial_sequence	91.2	RDP	S000968438_Eubacterium_sp._F1;_EU281854_	Bacteria	1	Bacteroidetes	1	Bacteroidia	1	Bacteroidales	1	Porphyromonadaceae	1	Barnesiella	0.6	2	1	1	-
638754422	SRX024348_SRR061730.379725	226	495	292	13	89	96.9	NT	gi|148246734|gb|EF602764.1|_Uncultured_bacterium_clone_16saw30-1f03.w2k_16S_ribosomal_RNA_gene,_partial_sequence	90.4	RDP	S000968438_Eubacterium_sp._F1;_EU281854_	Bacteria	1	Bacteroidetes	1	Bacteroidia	0.99	Bacteroidales	0.99	Porphyromonadaceae	0.94	Barnesiella	0.54	2	1	1	-
638754422	SRX024348_SRR061730.399412	438	766	327	13	89	95.7	NT	gi|119436398|gb|EF096444.1|_Uncultured_bacterium_clone_obob2_aaa02h08_16S_ribosomal_RNA_gene,_partial_sequence	92.9	RDP	S000546612_Gram-negative_bacterium_cL10-2b-4;_AY239469_	Bacteria	1	Bacteroidetes	0.99	Bacteroidia	0.94	Bacteroidales	0.94	Porphyromonadaceae	0.87	Barnesiella	0.47	3	2	2	-
638754422	SRX024348_SRR061730.481299	226	523	320	13	89	96.9	NT	gi|119438861|gb|EF098907.1|_Uncultured_bacterium_clone_SWPT1_aaa03b02_16S_ribosomal_RNA_gene,_partial_sequence	91.2	RDP	S000968438_Eubacterium_sp._F1;_EU281854_	Bacteria	1	Bacteroidetes	1	Bacteroidia	1	Bacteroidales	1	Porphyromonadaceae	0.98	Barnesiella	0.6	2	1	1	-
638754422	SRX024348_SRR061730.504618	488	670	181	13	89	94.5	NT	gi|119436212|gb|EF096258.1|_Uncultured_bacterium_clone_obob1_aaa03e09_16S_ribosomal_RNA_gene,_partial_sequence	91.2	RDP	S000546612_Gram-negative_bacterium_cL10-2b-4;_AY239469_	Bacteria	1	Bacteroidetes	0.96	Bacteroidia	0.92	Bacteroidales	0.92	Porphyromonadaceae	0.86	Barnesiella	0.66	2	1	1	-
638754422	SRX024348_SRR061730.516312	333	670	359	13	89	95	NT	gi|238300893|gb|GQ030511.1|_Uncultured_bacterium_clone_nbw879c05c1_16S_ribosomal_RNA_gene,_partial_sequence	89.6	RDP	S000546612_Gram-negative_bacterium_cL10-2b-4;_AY239469_	Bacteria	1	Bacteroidetes	1	Bacteroidia	1	Bacteroidales	1	Porphyromonadaceae	1	Barnesiella	0.85	3	2	2	-
638754422	SRX024348_SRR061730.836665	289	670	403	13	89	95.5	NT	gi|238300893|gb|GQ030511.1|_Uncultured_bacterium_clone_nbw879c05c1_16S_ribosomal_RNA_gene,_partial_sequence	90.2	RDP	S000546612_Gram-negative_bacterium_cL10-2b-4;_AY239469_	Bacteria	1	Bacteroidetes	1	Bacteroidia	1	Bacteroidales	1	Porphyromonadaceae	1	Barnesiella	0.89	3	2	2	-
638754422	SRX024348_SRR061730.874025	444	856	421	13	89	95.7	NT	gi|148247877|gb|EF603907.1|_Uncultured_bacterium_clone_16saw37-1d08.p1k_16S_ribosomal_RNA_gene,_partial_sequence	91	RDP	S000546612_Gram-negative_bacterium_cL10-2b-4;_AY239469_	Bacteria	1	Bacteroidetes	1	Bacteroidia	0.98	Bacteroidales	0.98	Porphyromonadaceae	0.75	Barnesiella	0.54	2	1	1	-
638754422	SRX024348_SRR061730.880832	438	677	238	13	89	95.8	NT	gi|119436212|gb|EF096258.1|_Uncultured_bacterium_clone_obob1_aaa03e09_16S_ribosomal_RNA_gene,_partial_sequence	93.3	RDP	S000546612_Gram-negative_bacterium_cL10-2b-4;_AY239469_	Bacteria	1	Bacteroidetes	1	Bacteroidia	0.97	Bacteroidales	0.97	Porphyromonadaceae	0.95	Barnesiella	0.72	3	2	2	-
638754422	SRX024348_SRR061730.903699	438	730	291	13	89	95.2	NT	gi|119436398|gb|EF096444.1|_Uncultured_bacterium_clone_obob2_aaa02h08_16S_ribosomal_RNA_gene,_partial_sequence	92.8	RDP	S000546612_Gram-negative_bacterium_cL10-2b-4;_AY239469_	Bacteria	1	Bacteroidetes	1	Bacteroidia	0.97	Bacteroidales	0.97	Porphyromonadaceae	0.95	Barnesiella	0.46	3	2	2	-
638754422	SRX024348_SRR061730.973311	438	838	409	13	89	95.6	NT	gi|148247877|gb|EF603907.1|_Uncultured_bacterium_clone_16saw37-1d08.p1k_16S_ribosomal_RNA_gene,_partial_sequence	90.8	RDP	S000546612_Gram-negative_bacterium_cL10-2b-4;_AY239469_	Bacteria	1	Bacteroidetes	1	Bacteroidia	0.99	Bacteroidales	0.99	Porphyromonadaceae	0.75	Barnesiella	0.55	2	1	1	-
638754422	SRX024348_SRR061730.985547	438	758	319	13	89	95.6	NT	gi|119436398|gb|EF096444.1|_Uncultured_bacterium_clone_obob2_aaa02h08_16S_ribosomal_RNA_gene,_partial_sequence	92.8	RDP	S000546612_Gram-negative_bacterium_cL10-2b-4;_AY239469_	Bacteria	1	Bacteroidetes	1	Bacteroidia	0.94	Bacteroidales	0.94	Porphyromonadaceae	0.91	Barnesiella	0.46	3	2	2	-
638754422	SRX024348_SRR061730.99846	444	856	421	13	89	95.7	NT	gi|148247877|gb|EF603907.1|_Uncultured_bacterium_clone_16saw37-1d08.p1k_16S_ribosomal_RNA_gene,_partial_sequence	91	RDP	S000546612_Gram-negative_bacterium_cL10-2b-4;_AY239469_	Bacteria	1	Bacteroidetes	1	Bacteroidia	0.96	Bacteroidales	0.96	Porphyromonadaceae	0.74	Barnesiella	0.49	2	1	1	-
638754422	SRX024348_SRR061731.102348	438	852	423	13	89	95.7	NT	gi|148247877|gb|EF603907.1|_Uncultured_bacterium_clone_16saw37-1d08.p1k_16S_ribosomal_RNA_gene,_partial_sequence	91.1	RDP	S000546612_Gram-negative_bacterium_cL10-2b-4;_AY239469_	Bacteria	1	Bacteroidetes	1	Bacteroidia	0.99	Bacteroidales	0.99	Porphyromonadaceae	0.83	Barnesiella	0.55	2	1	1	-
638754422	SRX024348_SRR061731.1073310	7	324	363	13	89	94	NT	gi|119438314|gb|EF098360.1|_Uncultured_bacterium_clone_SWPT15_aaa01e07_16S_ribosomal_RNA_gene,_partial_sequence	86.8	RDP	S000546612_Gram-negative_bacterium_cL10-2b-4;_AY239469_	Bacteria	1	Bacteroidetes	0.91	Bacteroidia	0.87	Bacteroidales	0.87	Porphyromonadaceae	0.81	Paludibacter	0.23	2	1	1	-
638754422	SRX024348_SRR061731.1083455	838	1277	461	13	89	96.5	NT	gi|169133647|gb|EU510710.1|_Uncultured_bacterium_clone_WD5_aak39g03_16S_ribosomal_RNA_gene,_partial_sequence	92	RDP	S000546612_Gram-negative_bacterium_cL10-2b-4;_AY239469_	Bacteria	1	Bacteroidetes	1	Bacteroidia	1	Bacteroidales	1	Porphyromonadaceae	1	Barnesiella	1	2	1	1	-
638754422	SRX024348_SRR061731.1104401	226	523	320	13	89	96.9	NT	gi|119438861|gb|EF098907.1|_Uncultured_bacterium_clone_SWPT1_aaa03b02_16S_ribosomal_RNA_gene,_partial_sequence	90.9	RDP	S000968438_Eubacterium_sp._F1;_EU281854_	Bacteria	1	Bacteroidetes	1	Bacteroidia	1	Bacteroidales	1	Porphyromonadaceae	0.95	Barnesiella	0.72	2	1	1	-
638754422	SRX024348_SRR061731.1111661	490	919	438	13	89	95.9	NT	gi|148247877|gb|EF603907.1|_Uncultured_bacterium_clone_16saw37-1d08.p1k_16S_ribosomal_RNA_gene,_partial_sequence	91.4	RDP	S000546612_Gram-negative_bacterium_cL10-2b-4;_AY239469_	Bacteria	1	Bacteroidetes	1	Bacteroidia	0.98	Bacteroidales	0.98	Porphyromonadaceae	0.75	Barnesiella	0.54	2	1	1	-
638754422	SRX024348_SRR061731.128715	22	357	381	13	89	94.5	NT	gi|290605931|gb|GU619337.1|_Uncultured_bacterium_clone_PF1442_16S_ribosomal_RNA_gene,_partial_sequence	86.8	RDP	S000546612_Gram-negative_bacterium_cL10-2b-4;_AY239469_	Bacteria	1	Bacteroidetes	0.97	Bacteroidia	0.94	Bacteroidales	0.94	Porphyromonadaceae	0.88	Barnesiella	0.34	2	1	1	-
638754422	SRX024348_SRR061731.137396	319	523	227	13	89	96.5	NT	gi|148246734|gb|EF602764.1|_Uncultured_bacterium_clone_16saw30-1f03.w2k_16S_ribosomal_RNA_gene,_partial_sequence	89.9	RDP	S000968438_Eubacterium_sp._F1;_EU281854_	Bacteria	1	Bacteroidetes	0.99	Bacteroidia	0.93	Bacteroidales	0.93	Porphyromonadaceae	0.93	Barnesiella	0.48	2	1	1	-
638754422	SRX024348_SRR061731.193239	7	342	381	13	89	94.3	NT	gi|119438314|gb|EF098360.1|_Uncultured_bacterium_clone_SWPT15_aaa01e07_16S_ribosomal_RNA_gene,_partial_sequence	87.4	RDP	S000546612_Gram-negative_bacterium_cL10-2b-4;_AY239469_	Bacteria	1	Bacteroidetes	0.98	Bacteroidia	0.94	Bacteroidales	0.94	Porphyromonadaceae	0.9	Barnesiella	0.4	2	1	1	-
638754422	SRX024348_SRR061731.255434	302	670	390	13	89	95.4	NT	gi|238300893|gb|GQ030511.1|_Uncultured_bacterium_clone_nbw879c05c1_16S_ribosomal_RNA_gene,_partial_sequence	90.4	RDP	S000546612_Gram-negative_bacterium_cL10-2b-4;_AY239469_	Bacteria	1	Bacteroidetes	1	Bacteroidia	1	Bacteroidales	1	Porphyromonadaceae	1	Barnesiella	0.71	3	2	2	-
638754422	SRX024348_SRR061731.273737	438	845	416	13	89	95.7	NT	gi|148247877|gb|EF603907.1|_Uncultured_bacterium_clone_16saw37-1d08.p1k_16S_ribosomal_RNA_gene,_partial_sequence	90.9	RDP	S000546612_Gram-negative_bacterium_cL10-2b-4;_AY239469_	Bacteria	1	Bacteroidetes	1	Bacteroidia	0.93	Bacteroidales	0.93	Porphyromonadaceae	0.75	Barnesiella	0.52	2	1	1	-
638754422	SRX024348_SRR061731.319203	226	425	222	13	89	96.4	NT	gi|148246739|gb|EF602769.1|_Uncultured_bacterium_clone_16saw30-1h04.w2k_16S_ribosomal_RNA_gene,_partial_sequence	89.2	RDP	S000968438_Eubacterium_sp._F1;_EU281854_	Bacteria	1	Bacteroidetes	0.99	Bacteroidia	0.99	Bacteroidales	0.99	Porphyromonadaceae	0.72	Odoribacter	0.22	2	1	1	-
638754422	SRX024348_SRR061731.338725	7	371	410	13	89	94.4	NT	gi|119438314|gb|EF098360.1|_Uncultured_bacterium_clone_SWPT15_aaa01e07_16S_ribosomal_RNA_gene,_partial_sequence	87.6	RDP	S000546612_Gram-negative_bacterium_cL10-2b-4;_AY239469_	Bacteria	1	Bacteroidetes	1	Bacteroidia	1	Bacteroidales	1	Porphyromonadaceae	0.96	Barnesiella	0.33	2	1	1	-
638754422	SRX024348_SRR061731.350992	284	670	408	13	89	95.6	NT	gi|238300893|gb|GQ030511.1|_Uncultured_bacterium_clone_nbw879c05c1_16S_ribosomal_RNA_gene,_partial_sequence	90.3	RDP	S000546612_Gram-negative_bacterium_cL10-2b-4;_AY239469_	Bacteria	1	Bacteroidetes	1	Bacteroidia	1	Bacteroidales	1	Porphyromonadaceae	1	Barnesiella	0.92	3	2	2	-
638754422	SRX024348_SRR061731.586794	438	677	238	13	89	95.8	NT	gi|119436212|gb|EF096258.1|_Uncultured_bacterium_clone_obob1_aaa03e09_16S_ribosomal_RNA_gene,_partial_sequence	93.3	RDP	S000546612_Gram-negative_bacterium_cL10-2b-4;_AY239469_	Bacteria	1	Bacteroidetes	1	Bacteroidia	0.97	Bacteroidales	0.97	Porphyromonadaceae	0.97	Barnesiella	0.69	3	2	2	-
638754422	SRX024348_SRR061731.735593	487	917	439	13	89	95.9	NT	gi|148247877|gb|EF603907.1|_Uncultured_bacterium_clone_16saw37-1d08.p1k_16S_ribosomal_RNA_gene,_partial_sequence	91.4	RDP	S000546612_Gram-negative_bacterium_cL10-2b-4;_AY239469_	Bacteria	1	Bacteroidetes	1	Bacteroidia	0.98	Bacteroidales	0.98	Porphyromonadaceae	0.83	Barnesiella	0.62	2	1	1	-
638754422	SRX024348_SRR061731.782485	438	766	327	13	89	95.7	NT	gi|119436398|gb|EF096444.1|_Uncultured_bacterium_clone_obob2_aaa02h08_16S_ribosomal_RNA_gene,_partial_sequence	92.9	RDP	S000546612_Gram-negative_bacterium_cL10-2b-4;_AY239469_	Bacteria	1	Bacteroidetes	1	Bacteroidia	0.96	Bacteroidales	0.96	Porphyromonadaceae	0.9	Barnesiella	0.61	3	2	2	-
638754422	SRX024348_SRR061731.794851	273	759	508	13	89	95.9	NT	gi|238300893|gb|GQ030511.1|_Uncultured_bacterium_clone_nbw879c05c1_16S_ribosomal_RNA_gene,_partial_sequence	90.5	RDP	S000546612_Gram-negative_bacterium_cL10-2b-4;_AY239469_	Bacteria	1	Bacteroidetes	1	Bacteroidia	1	Bacteroidales	1	Porphyromonadaceae	0.97	Barnesiella	0.9	3	2	2	-
638754422	SRX024348_SRR061731.798921	438	737	298	13	89	95.3	NT	gi|119436398|gb|EF096444.1|_Uncultured_bacterium_clone_obob2_aaa02h08_16S_ribosomal_RNA_gene,_partial_sequence	93	RDP	S000546612_Gram-negative_bacterium_cL10-2b-4;_AY239469_	Bacteria	1	Bacteroidetes	1	Bacteroidia	0.99	Bacteroidales	0.99	Porphyromonadaceae	0.94	Barnesiella	0.48	3	2	2	-
638754422	SRX024348_SRR061731.801845	7	362	401	13	89	94.3	NT	gi|119438314|gb|EF098360.1|_Uncultured_bacterium_clone_SWPT15_aaa01e07_16S_ribosomal_RNA_gene,_partial_sequence	87.3	RDP	S000546612_Gram-negative_bacterium_cL10-2b-4;_AY239469_	Bacteria	1	Bacteroidetes	0.99	Bacteroidia	0.98	Bacteroidales	0.98	Porphyromonadaceae	0.88	Barnesiella	0.26	2	1	1	-
638754422	SRX024348_SRR061731.91997	226	463	260	13	89	96.6	NT	gi|148246734|gb|EF602764.1|_Uncultured_bacterium_clone_16saw30-1f03.w2k_16S_ribosomal_RNA_gene,_partial_sequence	89.6	RDP	S000968438_Eubacterium_sp._F1;_EU281854_	Bacteria	1	Bacteroidetes	1	Bacteroidia	1	Bacteroidales	1	Porphyromonadaceae	0.92	Barnesiella	0.51	2	1	1	-
638754422	SRX024348_SRR061731.998916	7	292	331	13	89	93.4	NT	gi|119438226|gb|EF098272.1|_Uncultured_bacterium_clone_SWPT14_aaa04a04_16S_ribosomal_RNA_gene,_partial_sequence	86.1	RDP	S000546612_Gram-negative_bacterium_cL10-2b-4;_AY239469_	Bacteria	1	Bacteroidetes	0.94	Bacteroidia	0.83	Bacteroidales	0.83	Porphyromonadaceae	0.8	Paludibacter	0.28	2	1	1	-
809635352	SRX025497_SRR063908.837951	226	670	466	13	89	95.7	NT	gi|190343411|gb|EU791022.1|_Uncultured_bacterium_clone_HD5++67_16S_ribosomal_RNA_gene,_partial_sequence	90.5	RDP	S000546612_Gram-negative_bacterium_cL10-2b-4;_AY239469_	Bacteria	1	Bacteroidetes	1	Bacteroidia	1	Bacteroidales	1	Porphyromonadaceae	1	Barnesiella	0.91	1	1	2	-
764042746	GCDIEO201D4MBQ	V13	NA	471	14	1	93	NT	gi|169271529|gb|EU457325.1| Uncultured bacterium clone H83N2_83g05 16S ribosomal RNA gene, partial sequence	87.7	NT	gi|304569943|gb|GU324364.1|_Rumen_bacterium_NK3B98_16S_ribosomal_RNA_gene,_partial_sequence	Bacteria	1	Firmicutes	1	Clostridia	1	Clostridiales	1	Ruminococcaceae	0.99	Oscillibacter	0.68	NA	NA	10	R
158337416	SRX025494_SRR063901.127108	1298	1411	124	15	1	96	NT	gi|1236751|emb|X91814.1|_C.comitans_16S_ribosomal_RNA	96	RDP	S000381337_Sphingobacterium_comitans;_X91814_	Bacteria	1	Bacteroidetes	1	Bacteroidia	0.63	Bacteroidales	0.63	Porphyromonadaceae	0.44	Barnesiella	0.34	4	3	3	-
158337416	SRX025494_SRR063902.1194089	1199	1429	250	16	1	96.4	NT	gi|299888652|dbj|AB506288.1|_Uncultured_bacterium_gene_for_16S_rRNA,_partial_sequence,_clone:_R-C-A05	94.8	RDP	S000380157_Pseudobutyrivibrio_ruminis;_L4;_AY699285_	Bacteria	1	Firmicutes	1	Clostridia	1	Clostridiales	1	Lachnospiraceae	0.78	Robinsoniella	0.54	6	6	6	-
158337416	SRX025494_SRR063901.199333	590	1033	464	17	1	95.1	NT	gi|84875264|dbj|AB234467.1|_Uncultured_Clostridiales_bacterium_gene_for_16S_rRNA,_partial_sequence,_clone:_MgMjD-080	89.5	RDP	S000721545_Gracilibacter_thermotolerans_(T);_JW/YJL-S1;_DQ117465_	Bacteria	1	Firmicutes	0.97	Clostridia	0.97	Clostridiales	0.97	Gracilibacteraceae	0.56	Gracilibacter	0.54	1	1	1	-
809635352	SRX025495_SRR063904.728025	1261	1419	178	18	1	96.6	NT	gi|299888795|dbj|AB506431.1|_Uncultured_bacterium_gene_for_16S_rRNA,_partial_sequence,_clone:_R-W-H09	95.5	NT	gi|307645781|gb|HQ222293.1|_Clostridium_sp._enrichment_culture_clone_VanCtr97_16S_ribosomal_RNA_gene,_partial_sequence	Bacteria	1	Firmicutes	0.74	Clostridia	0.56	Clostridiales	0.45	Incertae_Sedis_XVIII	0.1	Symbiobacterium	0.1	4	3	4	-
158337416	SRX025494_SRR063901.1182501	1183	1430	279	19	1	95.4	NT	gi|295098739|emb|FP929041.1|_Eubacterium_cylindroides_T2-87_draft_genome	95.4	NT	gi|295098739|emb|FP929041.1|_Eubacterium_cylindroides_T2-87_draft_genome	Bacteria	1	Firmicutes	0.95	Erysipelotrichi	0.82	Erysipelotrichales	0.82	Erysipelotrichaceae	0.82	Allobaculum	0.69	1	1	1	-
158337416	SRX025494_SRR063901.123093	1100	1429	349	20	1	95.3	NT	gi|258617857|gb|GQ451208.1|_Uncultured_bacterium_clone_J61_16S_ribosomal_RNA_gene,_partial_sequence	90.3	RDP	S000392070_Turicibacter_sanguinis_(T);_AF349724_	Bacteria	1	Firmicutes	0.83	Erysipelotrichi	0.54	Erysipelotrichales	0.54	Erysipelotrichaceae	0.54	Bulleidia	0.43	16	13	13	-
638754422	SRX024348_SRR061731.891167	1235	1430	222	21	1	96.8	NT	gi|50789145|dbj|AB185791.1|_Uncultured_rumen_bacterium_gene_for_16S_rRNA,_partial_sequence,_clone:_U29-F01	95.9	NT	gi|291543184|emb|FP929052.1|_Ruminococcus_sp._18P13_draft_genome	Bacteria	1	Firmicutes	0.99	Clostridia	0.99	Clostridiales	0.99	Ruminococcaceae	0.8	Hydrogenoanaerobacterium	0.8	5	3	3	-
158337416	SRX025494_SRR063902.1101828	7	94	109	22	1	96.3	NT	gi|310840344|gb|GU104872.1|_Uncultured_bacterium_clone_HFV04_27_16S_ribosomal_RNA_gene,_partial_sequence	90.8	NT	gi|209865492|gb|FJ269050.1|_Iron-reducing_bacterium_enrichment_culture_clone_HN10_16S_ribosomal_RNA_gene,_partial_sequence	Bacteria	0.98	Actinobacteria	0.31	Actinobacteria	0.31	Actinomycetales	0.28	Micrococcaceae	0.26	Renibacterium	0.26	11	9	9	-
809635352	SRX025495_SRR063903.430075	68	389	329	23	2	94.2	NT	gi|192975223|gb|EU771246.1|_Uncultured_bacterium_clone_AE1_aaa04d02_16S_ribosomal_RNA_gene,_partial_sequence	89.7	RDP	S001587427_Clostridium_sp._YIT_12070;_AB491208_	Bacteria	1	Firmicutes	0.96	Clostridia	0.96	Clostridiales	0.94	Ruminococcaceae	0.82	Ethanoligenens	0.28	1	1	2	-
809635352	SRX025497_SRR063908.884417	68	398	338	23	2	94.4	NT	gi|192975223|gb|EU771246.1|_Uncultured_bacterium_clone_AE1_aaa04d02_16S_ribosomal_RNA_gene,_partial_sequence	89.9	RDP	S001587427_Clostridium_sp._YIT_12070;_AB491208_	Bacteria	1	Firmicutes	1	Clostridia	1	Clostridiales	0.99	Ruminococcaceae	0.88	Ethanoligenens	0.29	1	1	2	-
764143897	SRX025206_SRR063538.418363	1105	1395	310	24	4	94.2	NT	gi|238069005|gb|FJ881210.1|_Uncultured_bacterium_clone_R-8202_16S_ribosomal_RNA_gene,_partial_sequence	88.1	RDP	S001602625_Clostridiales_bacterium_oral_taxon_093;_CK059;_GQ422712_	Bacteria	0.99	Firmicutes	0.66	Clostridia	0.49	Clostridiales	0.49	Clostridiaceae	0.29	Thermotalea	0.14	20	19	19	-
764143897	SRX025206_SRR063539.811140	1217	1395	198	24	4	96.5	NT	gi|238069005|gb|FJ881210.1|_Uncultured_bacterium_clone_R-8202_16S_ribosomal_RNA_gene,_partial_sequence	91.4	RDP	S001602625_Clostridiales_bacterium_oral_taxon_093;_CK059;_GQ422712_	Bacteria	0.95	Firmicutes	0.61	Clostridia	0.54	Clostridiales	0.53	Clostridiaceae	0.28	Thermotalea	0.14	18	16	16	-
764143897	SRX025206_SRR063539.819990	1201	1395	214	24	4	96.3	NT	gi|238069005|gb|FJ881210.1|_Uncultured_bacterium_clone_R-8202_16S_ribosomal_RNA_gene,_partial_sequence	91.1	RDP	S001602625_Clostridiales_bacterium_oral_taxon_093;_CK059;_GQ422712_	Bacteria	0.98	Firmicutes	0.65	Clostridia	0.6	Clostridiales	0.59	Clostridiaceae	0.32	Thermotalea	0.12	18	16	16	-
764143897	SRX025206_SRR063549.602909	1201	1395	214	24	4	96.3	NT	gi|238069005|gb|FJ881210.1|_Uncultured_bacterium_clone_R-8202_16S_ribosomal_RNA_gene,_partial_sequence	91.1	RDP	S001602625_Clostridiales_bacterium_oral_taxon_093;_CK059;_GQ422712_	Bacteria	1	Firmicutes	0.68	Clostridia	0.61	Clostridiales	0.59	Clostridiaceae	0.29	Thermotalea	0.17	18	16	16	-
809635352	SRX025497_SRR063908.1095466	68	397	337	25	4	95.6	NT	gi|290598588|gb|GU611994.1|_Uncultured_bacterium_clone_DF3817_16S_ribosomal_RNA_gene,_partial_sequence	91.1	RDP	S000542416_human_intestinal_firmicute_CB47;_AB064910_	Bacteria	1	Firmicutes	1	Clostridia	1	Clostridiales	1	Ruminococcaceae	0.99	Oscillibacter	0.57	3	3	3	-
809635352	SRX025497_SRR063908.251529	4	397	444	25	4	92.2	NT	gi|290587392|gb|GU600799.1|_Uncultured_bacterium_clone_CF0811_16S_ribosomal_RNA_gene,_partial_sequence	87.2	RDP	S000542497_human_intestinal_firmicute_CJ7;_AB080895_	Bacteria	1	Firmicutes	1	Clostridia	1	Clostridiales	1	Ruminococcaceae	1	Oscillibacter	0.46	0	0	1	-
809635352	SRX025497_SRR063908.708184	68	481	427	25	4	91.8	NT	gi|310839539|gb|GU104067.1|_Uncultured_bacterium_clone_HFV02_425_16S_ribosomal_RNA_gene,_partial_sequence	89.7	RDP	S001153865_Ruminococcus_sp._NML_00-0124;_EU815223_	Bacteria	1	Firmicutes	0.98	Clostridia	0.98	Clostridiales	0.98	Ruminococcaceae	0.93	Oscillibacter	0.42	1	1	2	-
809635352	SRX025497_SRR063908.804050	68	397	337	25	4	95.6	NT	gi|290598588|gb|GU611994.1|_Uncultured_bacterium_clone_DF3817_16S_ribosomal_RNA_gene,_partial_sequence	91.1	RDP	S000542416_human_intestinal_firmicute_CB47;_AB064910_	Bacteria	1	Firmicutes	0.99	Clostridia	0.99	Clostridiales	0.99	Ruminococcaceae	0.99	Oscillibacter	0.48	3	3	3	-
764143897	SRX025206_SRR063539.134974	981	1360	400	26	2	96.3	NT	gi|12330109|emb|AJ408139.1|_Uncultured_equine_intestinal_eubacterium_sp._DW14_partial_16S_rRNA_gene,_clone_DW14	95.8	RDP	S002033270_Ruminococcus_sp._18P13;_FP929052_	Bacteria	1	Firmicutes	1	Clostridia	1	Clostridiales	1	Ruminococcaceae	1	Hydrogenoanaerobacterium	0.47	0	0	1	-
158337416	SRX025494_SRR063901.1194718	1288	1427	159	26	2	96.9	NT	gi|164521765|gb|EU348177.1|_Uncultured_bacterium_clone_KM2RB167_16S_ribosomal_RNA_gene,_partial_sequence	95	NT	gi|223928079|gb|FJ625861.1|_Clostridium_sp._enrichment_culture_clone_7-14_genomic_sequence	Bacteria	0.98	Firmicutes	0.76	Clostridia	0.74	Clostridiales	0.67	Ruminococcaceae	0.6	Papillibacter	0.28	2	2	2	-
